# Supplementary material
Source: Springer Nature journal article supplement (https://www.springermedizin.de/resource/supplementary/12961_2010_195_MOESM7_ESM.pdf/9571630)
Supplement: MOESM7 [file 9571630]

**Table 3: Comparison of Antimalarials Price and Percent Mark Up at ADDO**

| <b>Product</b>     | <b>Wholesale Price<br/>Tsh<br/>[\$]</b> | <b>Retail Price at<br/>ADDO Tsh<br/>[\$]</b> | <b>Profit Amount<br/>Tsh<br/>[\$]</b> | <b>% Profit<br/>Margin</b> |
|--------------------|-----------------------------------------|----------------------------------------------|---------------------------------------|----------------------------|
| <b>SP</b>          | 180-500 [0.14-0.38]                     | 500-800 [0.38-0.62]                          | 300-320 [0.23-0.25]                   | 61-164%                    |
| <b>Amodiaquine</b> | 200-500 [0.15-0.38]                     | 500-800 [0.38-0.62]                          | 300 [0.23]                            | 61-153%                    |
| <b>ACT</b>         | 350-1250 [0.27-0.96]                    | 500-1500 [0.38-1.15]                         | 150-350 [0.12-0.27]                   | 28-44%                     |
| <b>Quinine</b>     | 85 [0.065]                              | 100 [0.076]                                  | 15 [0.012]                            | 19%                        |
